# Supplementary material for: Raman analysis of bond conformations in the rotator state and premelting of normal alkanes
Source: Royal Society of Chemistry journal article supplement (doi:10.1039/c6sm00182c), 2016-01-01
Supplement: c6sm00182c1.pdf [file c6sm00182c1.pdf]

**Supplemental Material**  
**for**  
**Raman analysis of bond conformations in the rotator state and premelting of  
normal alkanes**

Anthony P. Kotula,<sup>a</sup> Angela R. Hight Walker,<sup>b</sup> Kalman B. Migler\*<sup>a</sup>

<sup>a</sup>Materials Science & Engineering Division and <sup>b</sup>Physical Measurements Laboratory, NIST,  
Gaithersburg, Maryland 20899, United States

\*Author to whom correspondence should be addressed: [kalman.migler@nist.gov](mailto:kalman.migler@nist.gov)

Official contribution of the National Institute of Standards and Technology; not subject to  
copyright in the United States.

## NCCT mass fraction

Figure A1 shows the NCCT mass fraction versus temperature for the alkanes ranging from  $C_{21}$  to  $C_{60}$ . The NCCT mass fraction in the higher alkanes ( $C_{40}$  to  $C_{60}$ ) are plotted individually in a truncated temperature window to highlight changes in the NCCT mass fraction near the melt temperature. The  $C_{21}$  to  $C_{37}$  alkanes exhibit a transition over a temperature range of approximately (1 to 2) °C from a small amount of chains in the NCCT conformation to a maximum value well above 70 % by mass. The Raman spectra corresponding to this large increase in the NCCT mass fraction resembles the rotator phase spectra in Figure 1a of the main text. In the case of the  $C_{37}$  alkane, the sharp increase in NCCT is preceded by small amount of NCCT conformers that initially reach mass fractions of approximately 0.06 at 66 °C and increase to 0.10 at a temperature of 77 °C. After reaching a maximum, the NCCT mass fraction in the  $C_{21}$  to  $C_{37}$  alkanes decreases with increasing temperature until an abrupt transition occurs at a higher temperature. The width of the temperature window where the NCCT mass fraction exceeds 0.5 gets narrower as the alkane chain length increases, ranging from approximately 9 °C for the  $C_{21}$  alkane to 2 °C for the  $C_{37}$  alkane. Immediately prior to the sharp loss of NCCT mass fraction, the  $C_{21}$  to  $C_{27}$  alkanes approach values in the range of  $0.67 < \alpha_{\text{ncct}} < 0.70$ , whereas the  $C_{37}$  alkane reaches a smaller mass fraction of  $0.57 \pm 0.03$  just prior to an abrupt decrease.

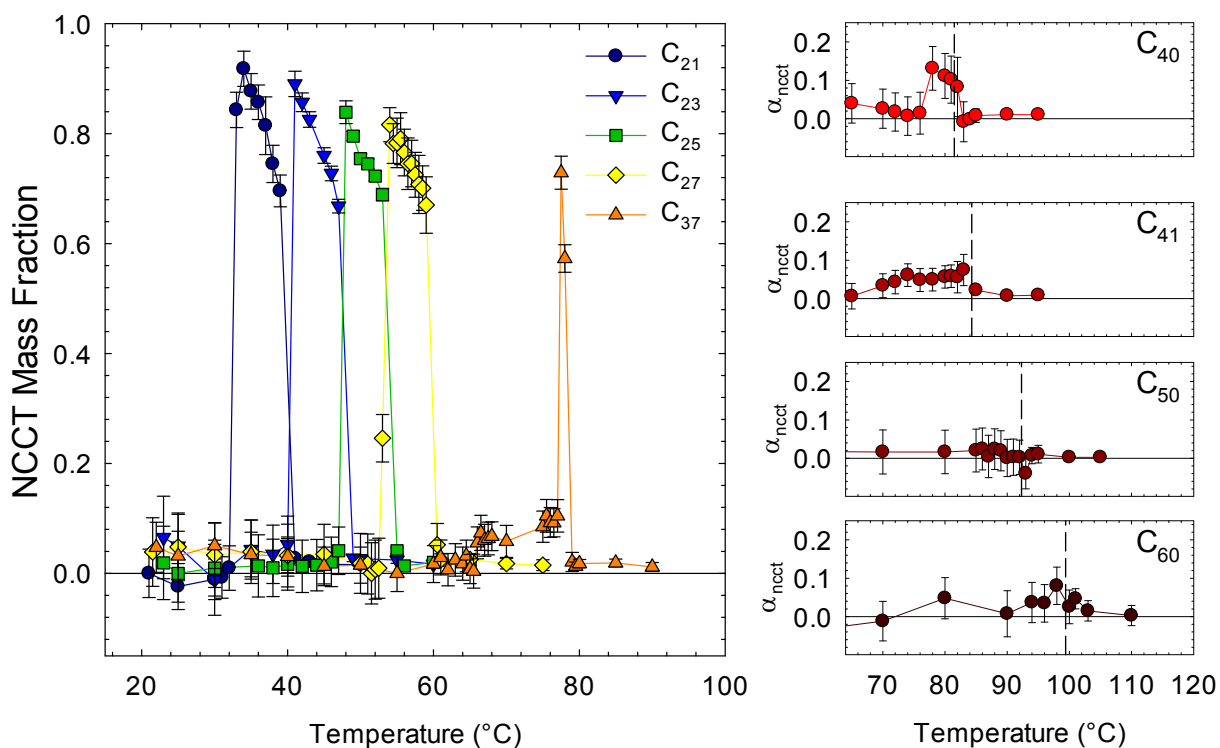

**Figure A1.** Mass fraction of NCCT conformers versus temperature for different alkanes. The left plot shows the alkanes C<sub>21</sub> through C<sub>37</sub>. Plots for the alkanes C<sub>40</sub> through C<sub>60</sub> near the melting transition temperature are shown on the right, with the alkane denoted in the upper right corner of each plot. The vertical dashed lines indicate the melting temperature for the alkanes C<sub>40</sub> to C<sub>60</sub>.<sup>1</sup>

Unlike the alkanes exhibiting a large NCCT mass fraction during heating, the C<sub>40</sub> to C<sub>60</sub> alkanes display much smaller NCCT mass fractions with less pronounced transitions. Of the four alkanes in this chain length range, the C<sub>40</sub> alkane has the largest transition near 78 °C, going from negligible NCCT mass fractions to a maximum value of  $0.13 \pm 0.06$ . This mass fraction decreases with increasing temperature up to 82 °C, above which the mass fraction sharply decreases to negligible amounts. The increase in the NCCT mass fraction with temperature is more gradual for the C<sub>41</sub> alkane, as noted in the results describing Figure 2b. Increasing the chain length even further to the C<sub>50</sub> alkane leads to values within measurement uncertainty over the entire temperature range. The C<sub>60</sub> alkane exhibits a slight increase in the NCCT mass fraction with increasing temperature

to a maximum value of  $0.08 \pm 0.05$  at  $98\text{ }^{\circ}\text{C}$  before decreasing to negligible values within measurement uncertainty.

The temperature at which the NCCT mass fraction dominates the mass fraction distribution coincides with the crystal-rotator transition temperature for the alkanes  $\text{C}_{21}$  through  $\text{C}_{37}$  measured using calorimetry techniques.<sup>2,3</sup> Likewise, the temperature where there is a sharp decrease in the NCCT mass fraction to negligible values corresponds to the previously measured rotator-melt transition temperature.<sup>2,3</sup> Chains longer than the  $\text{C}_{39}$  alkane exhibit a crystal-melt phase transition without passing through a rotator phase, which has been shown in prior DSC measurements.<sup>4</sup> The  $\text{C}_{40}$ ,  $\text{C}_{41}$ , and  $\text{C}_{60}$  alkanes generate a non-negligible amount of chains in an NCCT conformation that decreases at the crystal-melt transition temperatures tabulated in <sup>1</sup>. The  $\text{C}_{50}$  alkane does not.

<sup>1</sup>B. Wunderlich, *Macromolecular physics* (Academic Press, Inc., New York, 1980).

<sup>2</sup>E. B. Sirota and D. M. Singer, *J. Chem. Phys.* **101**, (1994).

<sup>3</sup>M. G. Broadhurst, *J. Res. Natl. Bur. Stand. A* **66**, (1962).

<sup>4</sup>S. Wang, K.-I. Tozaki, H. Hayashi, H. Inaba and H. Yamamoto, *Thermochim. Acta* **448**, (2006).
